# Supplementary material for: Effectors of Puccinia striiformis f. sp. tritici Suppressing the Pathogenic-Associated Molecular Pattern-Triggered Immune Response Were Screened by Transient Expression of Wheat Protoplasts
Source: MDPI journal article supplement (doi:10.3390/ijms22094985), 2021-05-07

SignalP-4.0 prediction (euk networks): PSEC2

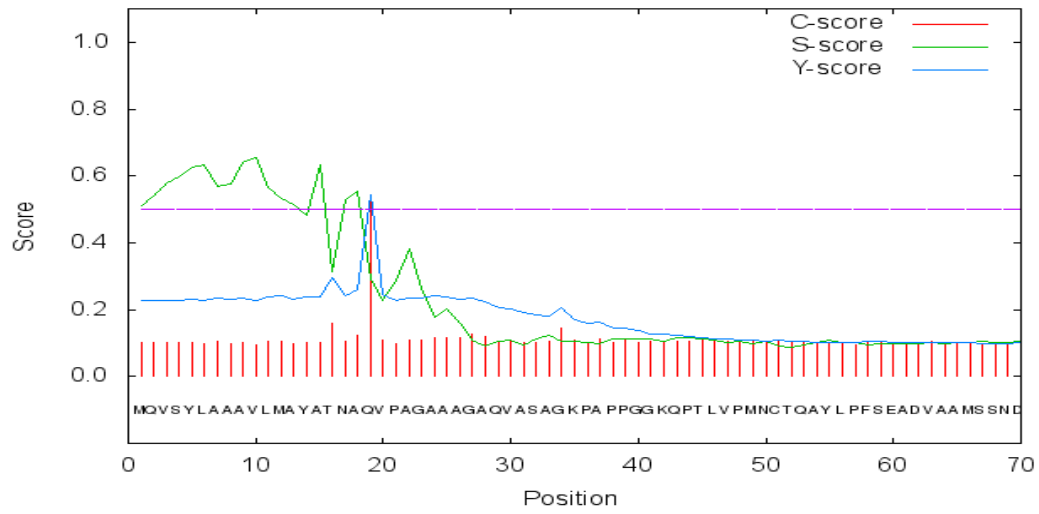

SignalP-4.0 prediction (euk networks): PSEC17

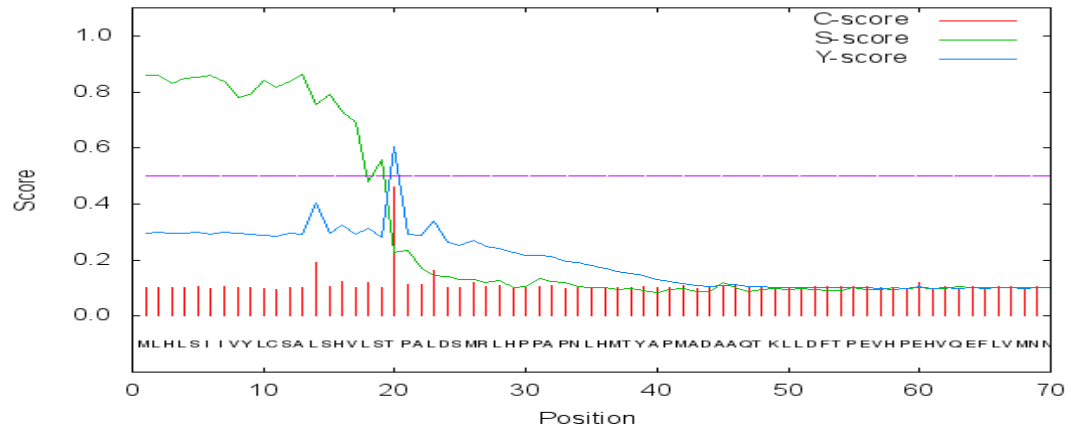

SignalP-4.0 prediction (euk networks): PSEC45

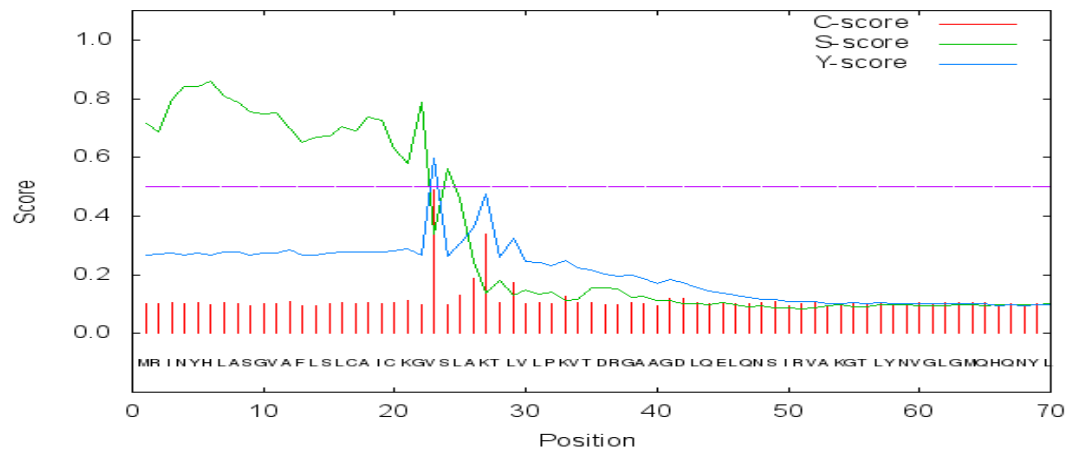

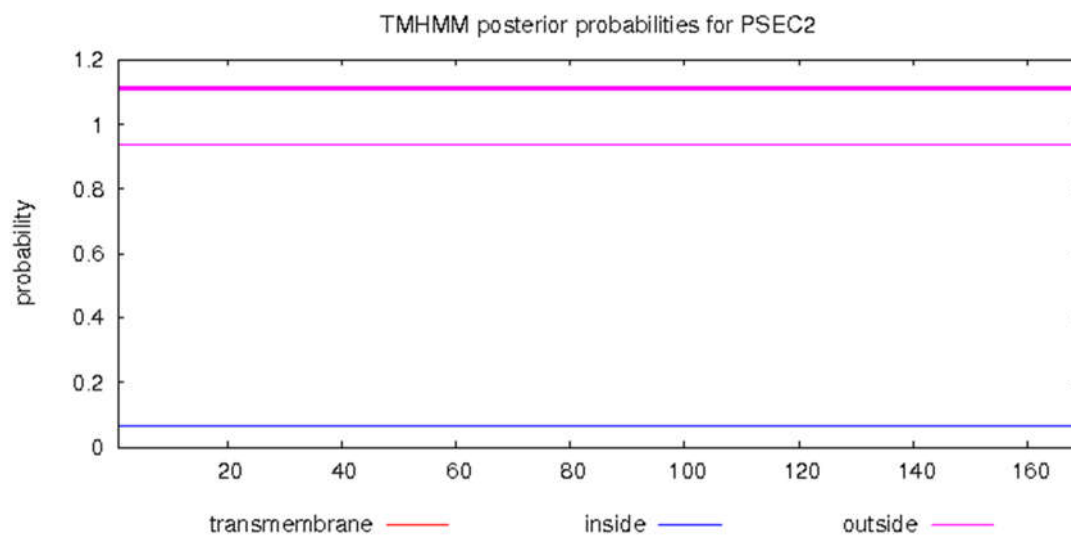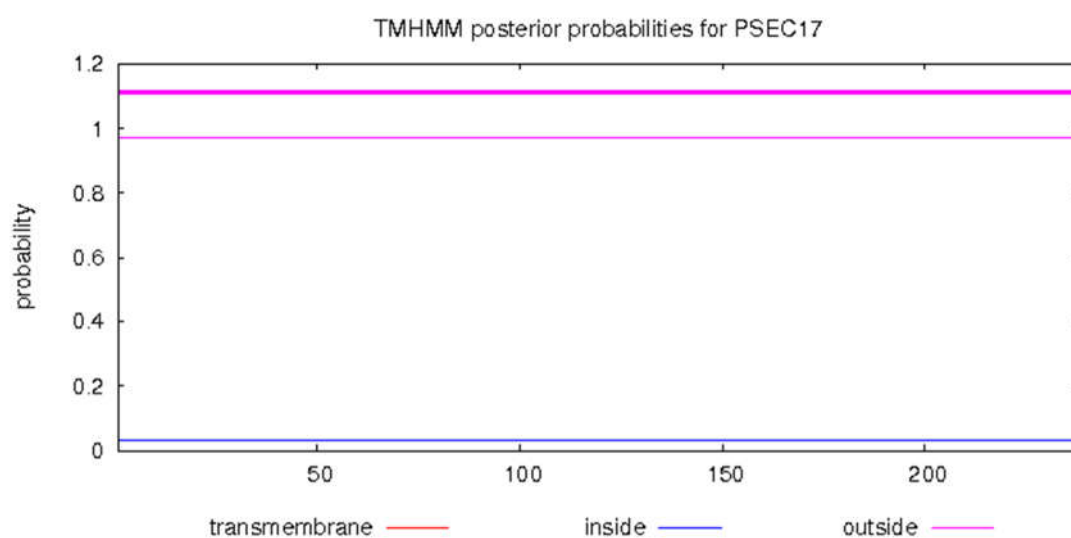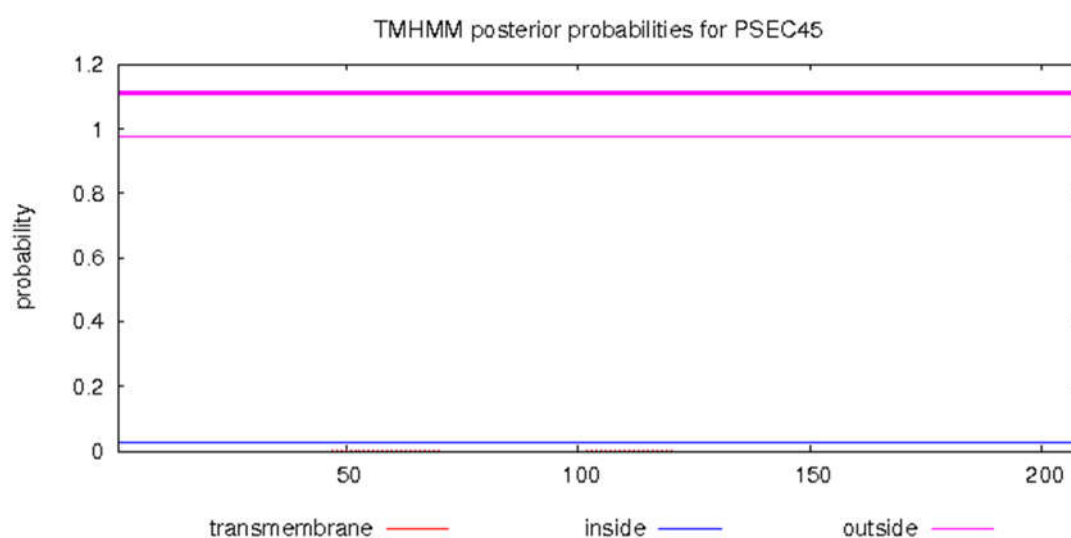

Supplement: s1 [file s1]
